# Supplementary material
Source: HighWire-hosted journal article supplement (https://bmjopen.bmj.com/content/12/10/e063594)
Supplement: inline-supplementary-material-1 [file inline-supplementary-material-1.pdf]

**Supplemental Table 1. Characteristics of subjects excluded due to presence of increased CHD risk or hypertension.**

|                                                              | Hypertensive (BP> 145/90<br>mmHg) (n=291) | 10-year CHD risk >20%<br>(n=146) |
|--------------------------------------------------------------|-------------------------------------------|----------------------------------|
| Median (IQR) age (years)                                     | 58.2 (12.24)                              | 58.7 (15.23)                     |
| No (%) men                                                   | 138 (47.4)                                | 142 (97.3)                       |
| No (%) current smokers                                       | 34 (11.7)                                 | 85 (58.2)                        |
| No (%) former smokers                                        | 65 (22.3)                                 | 24 (16.4)                        |
| No (%) never smokers                                         | 151 (51.9) [N/A41]                        | 37 (25.3)                        |
| Mean (SD) systolic BP (mmHg)                                 | 156.5 (9.75)                              | 132.2 (10.91)                    |
| Mean (SD) diastolic BP (mmHg)                                | 88.9 (9.68)                               | 77.3 (9.46)                      |
| Median (IQR) heart rate (beats per min)                      | 72.0 (16) [N/A215]                        | 68.0 (14) [N/A11]                |
| Mean (SD) total cholesterol (mmol/L)                         | 5.69 (1.03) [N/A55]                       | 6.07 (1.02)                      |
| Mean (SD) high density lipoprotein (mmol/l)                  | 1.42 (0.48) [N/A58]                       | 0.89 (0.24)                      |
| Mean (SD) low density lipoprotein (mmol/l)                   | 3.34 (0.92) [N/A71]                       | 3.93 (0.93) [N/A17]              |
| Median (IQR) triglycerides (mmol/l)                          | 1.82 (1.38) [N/A55]                       | 2.50 (1.93)                      |
| Median (IQR) Body mass index (kg/m <sup>2</sup> )            | 27.5 (5.5) [N/A202]                       | 28.3 (4.7) [N/A6]                |
| Median (IQR) weight (kg)                                     | 82.0 (18.60) [N/A202]                     | 83.6 (17.30) [N/A6]              |
| Mean (SD) height (cm)                                        | 168.5 (8.16) [N/A202]                     | 173.4 (7.51) [N/A6]              |
| Mean (SD) waist circumference (cm)                           | 91.1 (13.35) [N/A216]                     | 97.0 (12.93) [N/A10]             |
| Median (IQR) 10-year CHD event risk (%)                      | 5.0 (9.0) [N/A72]                         | 20.0 (5.0)                       |
| No (%) with family history of cardiovascular disease         | 49 (16.8) [N/A96]                         | 35 (23.2) [N/A9]                 |
| Scottish Index of Multiple Deprivation decile,<br>number (%) |                                           |                                  |
| 1                                                            | 12 (4.1)                                  | 8 (5.5)                          |
| 2                                                            | 19 (6.5)                                  | 11 (7.5)                         |
| 3                                                            | 29 (10.0)                                 | 20 (13.7)                        |
| 4                                                            | 19 (6.5)                                  | 10 (6.8)                         |
| 5                                                            | 14 (4.8)                                  | 10 (6.8)                         |
| 6                                                            | 21 (7.2)                                  | 14 (9.6)                         |
| 7                                                            | 45 (15.5)                                 | 22 (15.1)                        |
| 8                                                            | 51 (17.5)                                 | 22 (15.1)                        |
| 9                                                            | 61 (21.0)                                 | 24 (16.4)                        |
| 10                                                           | 18 (6.2)                                  | 4 (2.7)                          |
| N/A                                                          | 2 (0.7)                                   | 1 (0.7)                          |

BP, blood pressure, CHD, coronary heart disease, IQR, inter-quartile range, SD, standard deviation. Full data were not collected for all screen failed participants: the number of participants with missing data is indicated in italics.
